# Supplementary material for: Contribution of a genetic risk score to ethnic differences in fatty liver disease
Source: PubMed Central journal article supplement — Liver Int. Author manuscript; Available in PMC 2022 Oct 1. (PMC9427702; doi:10.1111/liv.15322), 2022-06-06
Supplement: NIHMS1811870-supplement-Supinfo.pdf [file NIHMS1811870-supplement-Supinfo.pdf]

## Contribution of a Genetic Risk Score to Ethnic Differences in Fatty Liver Disease

Maddie J. Kubiliun, MD, Jonathan C. Cohen, PhD, Helen H. Hobbs, MD, and Julia Kozlitina, PhD

### Table of Contents

|                                                                                                                                                 |           |
|-------------------------------------------------------------------------------------------------------------------------------------------------|-----------|
| <b>Supporting Information</b> .....                                                                                                             | <b>2</b>  |
| <b>Supporting Tables</b> .....                                                                                                                  | <b>4</b>  |
| Table S1. Baseline Characteristics of NAFLD and ALD Participants in UTSW-FLD Cohort.....                                                        | 4         |
| Table S2. Characteristics of FLD Patients Stratified by Disease Stage.....                                                                      | 5         |
| Table S3. Baseline Characteristics of Controls Stratified by Ethnicity.....                                                                     | 6         |
| Table S4. Association of Individual Variants with FLD in the Primary Cohort.....                                                                | 7         |
| Table S5. Distribution of Genetic Risk Score in the Primary Cohort Stratified by Ethnicity.....                                                 | 9         |
| Table S6. Baseline Characteristics of UTSW-FLD Patients and Age-, Gender- and Ethnicity-Matched Controls.....                                   | 10        |
| Table S7. Association of Individual Variants with FLD in the Matched Case-Control Cohort.....                                                   | 11        |
| Table S8. Distribution of Genetic Risk Score in the Matched Case-Control Cohort Stratified by Ethnicity.....                                    | 13        |
| Table S9. Association with FLD by Quintiles of Genetic Risk Score Stratified by Ethnicity in the Matched Case-Control Cohort.....               | 14        |
| Table S10. Distribution of Genetic Risk Score Based on External Weights in the Primary Cohort Stratified by Ethnicity.....                      | 15        |
| Table S11. Association with FLD by Quintiles of Genetic Risk Score Based on External Weights in the Primary Cohort Stratified by Ethnicity..... | 16        |
| Table S12. Distribution of Genetic Risk Score without PNPLA3-I148M Variant, Stratified by Ethnicity.....                                        | 17        |
| Table S13. Association with FLD by Quintiles of Genetic Risk Score without PNPLA3-I148M Variant Stratified by Ethnicity.....                    | 18        |
| <b>Supporting Figures</b> .....                                                                                                                 | <b>19</b> |
| Fig. S1. Ethnicity specific comparison of risk allele frequencies between UTSW-FLD Cohort participants and controls.....                        | 19        |
| Fig S2. Distribution of GRS among cases and controls stratified by ethnicity.....                                                               | 20        |
| <b>References</b> .....                                                                                                                         | <b>21</b> |

## **Supporting Information**

### **Matched Case-Control Cohort**

To ensure that genetic analyses were not confounded by differences between DHS participants and FLD patients with respect to age, sex and ethnic composition, we also performed a sensitivity analysis by selecting a sample of sex-, age-, and ethnicity-matched controls. To supplement the relatively small number of Whites and Hispanics in the Dallas Heart Study sample, additional controls were obtained from the Dallas Biobank (DB). The DB is a repository of genomic DNA and plasma samples obtained from individuals in North-Central Texas.<sup>1</sup> Study participants provided written informed consent for inclusion in the repository, and were over 18 years of age. Whites in the DB had completed a preventive medicine examination at the Cooper Clinic in Dallas, TX between 2008 and 2012 and were enrolled into the study after signing an informed consent approved by the Cooper Research Institute IRB. DB participants with elevated levels of serum ALT level were excluded. Controls were matched to FLD patients 1:1 for sex, ethnicity, and age (using a caliper of 0.5 SD units).

The matched case-control analysis included 1162 FLD patients, for whom we were able to identify a match (424 Whites, 57 Blacks, 646 Hispanic, and 35 other ethnicities), and an equal number of matched controls (712 from the DHS and 450 from the DB).

### **Genotype QC**

Genotypes underwent standard quality control filtering (call rate >95%, Hardy-Weinberg equilibrium p-value >0.001 among controls). The allele frequencies of all variants among self-reported White, Black and Hispanic controls were concordant with frequencies reported among corresponding ethnic groups in gnomAD (<https://gnomad.broadinstitute.org>) and the 1000 Genomes Project (<https://www.internationalgenome.org>). In addition, in a subset of DHS participants (>75%) and UTSW-FLD participants (~35%), genotypes for the above variants were assayed using an independent method (Illumina Exome Chip and TaqMan assay in DHS, and

whole-exome sequencing in UTSW-FLD). Among these participants, cross-platform genotype concordance was >99.5%.

### **Sensitivity Analysis – GRS based on Weights from External Cohorts**

To correct for possible bias resulting from using internally estimated weights, we performed an additional sensitivity analysis, in which the weights were estimated externally, based on data from previous studies. For *PNPLA3*-rs738409, the estimates of association with different stages of NAFLD and ALD have ranged between OR=1.5 and OR=3.26 per each risk allele, with most studies reporting odds ratios >2.<sup>2-5</sup> For *TM6SF2*-rs58542926, effect estimates have ranged between OR=1.5 and OR=2.1.<sup>2,4,5</sup> For *TMC4/IMBOAT7*-rs641738 and *GCKR*-rs1260326, the reported odds ratios have ranged between OR=1.2 and 2.1.<sup>10,4</sup> For *HSD17B13*-rs72613567, heterozygous odds ratios have been in the range 0.56-0.84.<sup>5,6</sup> We therefore used the mid- to lower-bound values of these ranges as conservative estimates of the effects of these variants. We could not identify independent estimates of the effect of *HSD17B13*-rs80182459. However, given that both *HSD17B13*-rs80182459 and -rs72613567 result in a loss of function, we assumed that the effect of rs80182459 is similar to that of rs72613567. Similarly, we identified only one independent report of the association of *PNPLA3*-rs6006460 with steatosis.<sup>7</sup> In this report and in our own data,<sup>8</sup> the effect of *PNPLA3*-rs6006460 was about 0.5-0.7 times the magnitude of the effect of *PNPLA3*-rs738409, but in the opposite direction. We therefore estimated the effect of this variant to be  $-0.6 * \log(\text{effect of } PNPLA3\text{-rs738409})$ . The resulting score was calculated as follows:

$$\begin{aligned} \text{GRS}_{\text{external weights}} = & \ln(2) \text{ } PNPLA3\text{-rs738409} + \ln(1.8) \text{ } TM6SF2\text{-rs58542926} + \log(1.2) \\ & TMC4/IMBOAT7\text{-rs641738} + \log(1.2) \text{ } GCKR\text{-rs1260326} + \ln(0.7) \text{ } HSD17B13\text{-rs72613567} + \\ & \ln(0.7) \text{ } HSD17B13\text{-rs80182459} - 0.6 * \ln(2) \text{ } PNPLA3\text{-rs6006460}. \end{aligned}$$

**Table S1** Baseline Characteristics of NAFLD and ALD Participants in UTSW-FLD Cohort

| Characteristic                          | No. of<br>people<br>with data | NAFLD<br>(n=733)   | ALD<br>(n=461)   | P-<br>value |
|-----------------------------------------|-------------------------------|--------------------|------------------|-------------|
| Age, years, mean $\pm$ SD               | 1194                          | 55 $\pm$ 12.7      | 52.6 $\pm$ 10.3  | <0.001      |
| Female, N (%)                           | 1194                          | 543 (74.1)         | 118 (25.6)       | <0.001      |
| Race/ethnicity, N (%)                   |                               |                    |                  |             |
| Non-Hispanic Black                      | 1194                          | 35 (4.8)           | 22 (4.8)         | 1           |
| Non-Hispanic White                      | 1194                          | 249 (34)           | 180 (39)         | 0.083       |
| Hispanic                                | 1194                          | 418 (57)           | 250 (54.2)       | 0.369       |
| Other                                   | 1194                          | 31 (4.2)           | 9 (2)            | 0.033       |
| BMI, kg/m <sup>2</sup> , mean $\pm$ SD  | 1194                          | 34.2 $\pm$ 7.2     | 29.6 $\pm$ 6.5   | <0.001      |
| Glucose, mg/dL, median (IQR)            | 1028                          | 116 (96 - 161)     | 106 (91 - 136)   | 0.015       |
| Type 2 Diabetes                         | 1194                          | 386 (52.7)         | 118 (25.6)       | <0.001      |
| Systolic BP, mm Hg, mean $\pm$ SD       | 1176                          | 128.4 $\pm$ 16.5   | 122.5 $\pm$ 16.3 | <0.001      |
| Diastolic BP, mm Hg, mean $\pm$ SD      | 1176                          | 72.5 $\pm$ 11.5    | 69.9 $\pm$ 11.2  | <0.001      |
| Total cholesterol, mg/dL, mean $\pm$ SD | 849                           | 168.9 $\pm$ 48.5   | 149.3 $\pm$ 56.4 | <0.001      |
| LDL-cholesterol, mg/dL, mean $\pm$ SD   | 835                           | 92.7 $\pm$ 37.5    | 82.4 $\pm$ 40.8  | <0.001      |
| HDL-cholesterol, mg/dL, mean $\pm$ SD   | 843                           | 44.6 $\pm$ 15.6    | 40.9 $\pm$ 23.2  | 0.081       |
| Triglycerides, mg/dL, median (IQR)      | 851                           | 129 (93 - 195.5)   | 94 (69 - 140.2)  | <0.001      |
| ALT (U), median (IQR)                   | 1177                          | 43 (28 - 69)       | 31 (22 - 46)     | <0.001      |
| AST (U), median (IQR)                   | 1174                          | 42 (31 - 61)       | 48 (33 - 73)     | 0.0028      |
| AST/ALT, median (IQR)                   | 1173                          | 0.96 (0.72 - 1.34) | 1.57 (1.2 - 2.1) | <0.001      |

UTSW-FLD subjects stratified based on etiology of fatty liver disease (FLD), either nonalcoholic fatty liver disease (NAFLD) or alcoholic fatty liver disease (ALD).

BP, blood pressure; TG, triglyceride; ALT, alanine aminotransaminase; AST, aspartate aminotransferase

**Table S2:** Characteristics of FLD Patients Stratified by Disease Stage

| Characteristic                          | Total              | Steatosis/<br>Steatohepatitis | Cirrhosis          | HCC                | P-value |
|-----------------------------------------|--------------------|-------------------------------|--------------------|--------------------|---------|
| N                                       | 1194               | 446                           | 684                | 64                 |         |
| Age, years, mean $\pm$ SD               | 54.1 $\pm$ 11.9    | 49.6 $\pm$ 12.2               | 56.2 $\pm$ 10.7    | 63 $\pm$ 10.2      | <0.001  |
| Female, N (%)                           | 661 (55.4)         | 317 (71.1)                    | 327 (47.8)         | 17 (26.6)          | <0.001  |
| Race/ethnicity, N (%)                   |                    |                               |                    |                    |         |
| Non-Hispanic White                      | 429 (35.9)         | 128 (28.7)                    | 274 (40.1)         | 27 (42.2)          | 0.15    |
| Non-Hispanic Black                      | 57 (4.8)           | 32 (7.2)                      | 24 (3.5)           | 1 (1.6)            | 0.046   |
| Hispanic                                | 668 (55.9)         | 261 (58.5)                    | 372 (54.4)         | 35 (54.7)          | 0.42    |
| Other                                   | 40 (3.4)           | 25 (5.6)                      | 14 (2)             | 1 (1.6)            | <0.001  |
| BMI, kg/m <sup>2</sup> , mean $\pm$ SD  | 32.4 $\pm$ 7.3     | 33.7 $\pm$ 6.8                | 31.8 $\pm$ 7.5     | 30.2 $\pm$ 6.4     | <0.001  |
| Glucose, mg/dL, median (IQR)            | 111 (94 - 150)     | 105 (93 - 136)                | 115 (95 - 158)     | 115 (99 - 143.8)   | 0.051   |
| Type 2 Diabetes                         | 504 (42.2)         | 163 (36.5)                    | 306 (44.7)         | 35 (54.7)          | 0.020   |
| Systolic BP, mm Hg, mean $\pm$ SD       | 126.1 $\pm$ 16.7   | 128.1 $\pm$ 14.9              | 124.7 $\pm$ 17.6   | 126.8 $\pm$ 17.2   | <0.001  |
| Diastolic BP, mm Hg, mean $\pm$ SD      | 71.5 $\pm$ 11.5    | 76.3 $\pm$ 10.2               | 68.9 $\pm$ 11.2    | 66.4 $\pm$ 11.3    | <0.001  |
| Total cholesterol, mg/dL, mean $\pm$ SD | 162.1 $\pm$ 52.2   | 186 $\pm$ 43                  | 144.9 $\pm$ 51.9   | 150.3 $\pm$ 47.5   | <0.001  |
| LDL-cholesterol, mg/dL, mean $\pm$ SD   | 89.2 $\pm$ 39      | 105.4 $\pm$ 35.9              | 78.1 $\pm$ 37.8    | 76.1 $\pm$ 27.7    | <0.001  |
| HDL-cholesterol, mg/dL, mean $\pm$ SD   | 43.4 $\pm$ 18.6    | 44.3 $\pm$ 13.4               | 42.3 $\pm$ 21.7    | 47.3 $\pm$ 19.6    | <0.001  |
| Triglycerides, mg/dL, median (IQR)      | 117 (82 - 179)     | 152 (110 - 234)               | 99 (71 - 142)      | 87 (71 - 131)      | <0.001  |
| ALT (U), median (IQR)                   | 37 (25 - 60)       | 54 (32 - 84.5)                | 31 (23 - 46)       | 38 (25.5 - 47)     | <0.001  |
| AST (U), median (IQR)                   | 44 (31.2 - 66)     | 39 (28 - 65)                  | 46 (33.5 - 67)     | 55 (41 - 73)       | <0.001  |
| AST/ALT, median (IQR)                   | 1.18 (0.82 - 1.69) | 0.78 (0.62 - 0.98)            | 1.47 (1.12 - 1.92) | 1.48 (1.18 - 1.88) | <0.001  |

For continuous characteristics, P-values were calculated using linear regression models, adjusted for age, gender, ethnicity, and BMI, where appropriate. For categorical variables, P-values were calculated using logistic regression with the same covariates. Disease stage was entered into the model as a categorical variable and coded using dummy variables.

**Table S3.** Baseline Characteristics of Controls Stratified by Ethnicity

| Characteristic                            | White<br>(1)     | Black<br>(2)     | Hispanic<br>(3)  | P-value<br>(2 vs 1) | P-value<br>(3 vs 1) | P-value<br>(3 vs 2) |
|-------------------------------------------|------------------|------------------|------------------|---------------------|---------------------|---------------------|
| N                                         | 863              | 1767             | 417              |                     |                     |                     |
| Age, years, mean $\pm$ SD                 | 49.8 $\pm$ 11.6  | 47.5 $\pm$ 11.6  | 42.9 $\pm$ 10.9  | <b>&lt;0.001</b>    | <b>&lt;0.001</b>    | <b>&lt;0.001</b>    |
| Female, N (%)                             | 512 (59.3)       | 1081 (61.2)      | 246 (59)         | 0.37                | 0.95                | 0.44                |
| BMI, kg/m <sup>2</sup> , mean $\pm$ SD    | 28.4 $\pm$ 6.5   | 31.8 $\pm$ 8.3   | 29.3 $\pm$ 6.2   | <b>&lt;0.001</b>    | <b>0.0011</b>       | <b>&lt;0.001</b>    |
| Obese, N (%)                              | 273 (31.6)       | 901 (51)         | 154 (36.9)       | <b>&lt;0.001</b>    | <b>0.012</b>        | <b>&lt;0.001</b>    |
| Glucose, mg/dL, median (IQR)              | 93 (87 - 99)     | 91 (84 - 101)    | 94 (87 - 102)    | <b>0.0058</b>       | <b>&lt;0.001</b>    | <b>&lt;0.001</b>    |
| Type 2 Diabetes                           | 69 (8)           | 277 (15.7)       | 38 (9.1)         | <b>&lt;0.001</b>    | <b>0.017</b>        | 0.38                |
| Systolic BP, mm Hg, mean $\pm$ SD         | 124.6 $\pm$ 17.5 | 134.2 $\pm$ 20.7 | 121.4 $\pm$ 18.6 | <b>&lt;0.001</b>    | 0.86                | <b>&lt;0.001</b>    |
| Diastolic BP, mm Hg, mean $\pm$ SD        | 76.7 $\pm$ 8.2   | 81.9 $\pm$ 9.9   | 75.6 $\pm$ 9.1   | <b>&lt;0.001</b>    | 0.095               | <b>&lt;0.001</b>    |
| ALT (U), median (IQR)                     | 18 (14 - 23)     | 16 (12 - 21)     | 18 (14 - 23)     | <b>&lt;0.001</b>    | 0.55                | <b>&lt;0.001</b>    |
| AST (U), median (IQR)                     | 20 (17 - 24)     | 19 (16 - 23)     | 20 (17 - 24)     | 0.10                | 0.43                | <b>0.034</b>        |
| Net number of risk alleles, mean $\pm$ SD | 1.6 $\pm$ 1.35   | 0.55 $\pm$ 1.26  | 1.9 $\pm$ 1.42   | <b>&lt;0.0001</b>   | <b>0.0003</b>       | <b>&lt;0.0001</b>   |
| GRS, mean $\pm$ SD                        | 0.56 $\pm$ 0.66  | -0.15 $\pm$ 0.91 | 0.91 $\pm$ 0.85  | <b>&lt;0.0001</b>   | <b>&lt;0.0001</b>   | <b>&lt;0.0001</b>   |

Obesity is defined as BMI  $\geq$ 30 kg/m<sup>2</sup>. BP, blood pressure; ALT, alanine aminotransaminase; AST, aspartate aminotransferase

**Table S4:** Association of Individual Variants with FLD in the Primary Cohort

| Gene variant      | SNP        | Allele | Cases (UTSW-FLD)   |     |     |                  |                    | P (HWE) | Controls |                  |         |      |                    | OR (95% CI) | P-value |
|-------------------|------------|--------|--------------------|-----|-----|------------------|--------------------|---------|----------|------------------|---------|------|--------------------|-------------|---------|
|                   |            |        | Genotype frequency |     |     | Allele frequency | Genotype frequency |         |          | Allele frequency | P (HWE) |      |                    |             |         |
|                   |            |        | REF                | HET | HOM |                  | REF                |         | HET      |                  |         | HOM  |                    |             |         |
| <b>All groups</b> |            |        |                    |     |     |                  |                    |         |          |                  |         |      |                    |             |         |
| PNPLA3 I148M      | rs738409   | G      | 276                | 470 | 446 | 0.5713           | -                  | 2021    | 936      | 163              | 0.2022  | -    | 2.6 (2.3 - 2.93)   | 1.1E-57     |         |
| TM6SF2 E167K      | rs58542926 | T      | 999                | 183 | 10  | 0.0852           | -                  | 2867    | 248      | 4                | 0.0410  | -    | 1.88 (1.5 - 2.36)  | 6.3E-08     |         |
| GCKR P446L        | rs1260326  | T      | 486                | 541 | 161 | 0.3632           | -                  | 1874    | 1045     | 201              | 0.2319  | -    | 1.23 (1.09 - 1.38) | 8.3E-04     |         |
| TMC4/MBOAT7       | rs641738   | T      | 431                | 560 | 196 | 0.4010           | -                  | 1302    | 1409     | 397              | 0.3544  | -    | 1.12 (1 - 1.25)    | 0.060       |         |
| PNPLA3 S453I      | rs6006460  | T      | 1175               | 8   | 0   | 0.0034           | -                  | 2737    | 364      | 19               | 0.0644  | -    | 0.26 (0.11 - 0.51) | 1.9E-05     |         |
| HSD17B13 A192fs   | rs80182459 | -      | 1148               | 31  | 1   | 0.0140           | -                  | 2483    | 566      | 71               | 0.1135  | -    | 0.44 (0.28 - 0.66) | 5.1E-05     |         |
| HSD17B13 splice   | rs72613567 | TA     | 913                | 239 | 30  | 0.1265           | -                  | 2392    | 633      | 95               | 0.1319  | -    | 0.69 (0.59 - 0.81) | 2.9E-06     |         |
| <b>White</b>      |            |        |                    |     |     |                  |                    |         |          |                  |         |      |                    |             |         |
| PNPLA3 I148M      | rs738409   | G      | 163                | 184 | 81  | 0.4042           | 0.027              | 526     | 300      | 37               | 0.2167  | 0.55 | 2.32 (1.9 - 2.85)  | 4.4E-17     |         |
| TM6SF2 E167K      | rs58542926 | T      | 330                | 90  | 9   | 0.1259           | 0.38               | 761     | 100      | 2                | 0.0603  | 0.76 | 2.09 (1.53 - 2.88) | 4.8E-06     |         |
| GCKR P446L        | rs1260326  | T      | 126                | 220 | 82  | 0.4486           | 0.44               | 320     | 422      | 121              | 0.3847  | 0.35 | 1.37 (1.13 - 1.65) | 0.0010      |         |
| TMC4/MBOAT7       | rs641738   | T      | 125                | 206 | 96  | 0.4660           | 0.56               | 297     | 414      | 148              | 0.4133  | 0.89 | 1.17 (0.97 - 1.4)  | 0.097       |         |
| PNPLA3 S453I      | rs6006460  | T      | 427                | 1   | 0   | 0.0012           | 1                  | 862     | 1        | 0                | 0.0006  | 1    | -                  | -           |         |
| HSD17B13 A192fs   | rs80182459 | -      | 423                | 1   | 0   | 0.0012           | 1                  | 861     | 2        | 0                | 0.0012  | 1    | -                  | -           |         |
| HSD17B13 splice   | rs72613567 | TA     | 264                | 134 | 28  | 0.2230           | 0.068              | 462     | 332      | 69               | 0.2723  | 0.39 | 0.85 (0.69 - 1.04) | 0.11        |         |
| <b>Black</b>      |            |        |                    |     |     |                  |                    |         |          |                  |         |      |                    |             |         |
| PNPLA3 I148M      | rs738409   | G      | 36                 | 20  | 1   | 0.1930           | 0.67               | 1317    | 416      | 34               | 0.1370  | 0.84 | 1.44 (0.87 - 2.29) | 0.15        |         |
| TM6SF2 E167K      | rs58542926 | T      | 54                 | 3   | 0   | 0.0263           | 1                  | 1655    | 110      | 2                | 0.0323  | 0.70 | 0.77 (0.19 - 2.1)  | 0.64        |         |
| GCKR P446L        | rs1260326  | T      | 48                 | 8   | 1   | 0.0877           | 0.35               | 1322    | 417      | 28               | 0.1338  | 0.54 | 0.61 (0.3 - 1.14)  | 0.13        |         |
| TMC4/MBOAT7       | rs641738   | T      | 20                 | 31  | 6   | 0.3772           | 0.40               | 812     | 750      | 198              | 0.3256  | 0.21 | 1.24 (0.84 - 1.82) | 0.27        |         |
| PNPLA3 S453I      | rs6006460  | T      | 50                 | 6   | 0   | 0.0536           | 1                  | 1403    | 347      | 17               | 0.1078  | 0.46 | 0.45 (0.17 - 0.94) | 0.032       |         |
| HSD17B13 A192fs   | rs80182459 | -      | 40                 | 14  | 1   | 0.1455           | 1                  | 1164    | 533      | 70               | 0.1904  | 0.35 | 0.72 (0.4 - 1.2)   | 0.22        |         |
| HSD17B13 splice   | rs72613567 | TA     | 49                 | 8   | 0   | 0.0702           | 1                  | 1577    | 181      | 9                | 0.0563  | 0.17 | 1.26 (0.55 - 2.47) | 0.56        |         |

**Hispanic**

|                 |            |    |     |     |     |        |       |     |     |    |        |       |                    |         |
|-----------------|------------|----|-----|-----|-----|--------|-------|-----|-----|----|--------|-------|--------------------|---------|
| PNPLA3 I148M    | rs738409   | G  | 63  | 250 | 354 | 0.7181 | 0.056 | 136 | 191 | 90 | 0.4448 | 0.14  | 2.98 (2.41 - 3.72) | 8.7E-26 |
| TM6SF2 E167K    | rs58542926 | T  | 584 | 81  | 1   | 0.0623 | 0.50  | 386 | 30  | 0  | 0.0361 | 1     | 1.76 (1.08 - 2.92) | 0.023   |
| GCKR P446L      | rs1260326  | T  | 299 | 290 | 74  | 0.3303 | 0.79  | 197 | 178 | 42 | 0.3141 | 0.82  | 1.18 (0.95 - 1.46) | 0.13    |
| TMC4/MBOAT7     | rs641738   | T  | 277 | 304 | 82  | 0.3529 | 1     | 173 | 198 | 45 | 0.3462 | 0.33  | 1.05 (0.85 - 1.31) | 0.64    |
| PNPLA3 S453I    | rs6006460  | T  | 658 | 1   | 0   | 0.0008 | 1     | 406 | 10  | 1  | 0.0144 | 0.077 | 0.06 (0 - 0.39)    | 0.0010  |
| HSD17B13 A192fs | rs80182459 | -  | 645 | 16  | 0   | 0.0121 | 1     | 392 | 24  | 1  | 0.0312 | 0.33  | 0.31 (0.14 - 0.66) | 0.0020  |
| HSD17B13 splice | rs72613567 | TA | 573 | 85  | 2   | 0.0674 | 0.76  | 308 | 95  | 14 | 0.1475 | 0.076 | 0.47 (0.33 - 0.65) | 4.9E-06 |

P-values for deviation from Hardy-Weinberg equilibrium (HWE) were calculated using exact test. P-values for association between variant alleles and FLD status were calculated using logistic regression adjusted for age, gender, BMI, and ethnicity (in the all groups analysis).

\*For variants with fewer than 5 carriers in cases and controls, unadjusted odds ratios and p-values were calculated using Fisher's exact.



**Table S5:** Distribution of Genetic Risk Score in the Primary Cohort Stratified by Ethnicity

| Ethnicity                            | Mean $\pm$ SD   |                  | OR (95% CI)        | P-value |
|--------------------------------------|-----------------|------------------|--------------------|---------|
|                                      | UTSW-FLD        | Controls         |                    |         |
| <b><u>Net risk allele number</u></b> |                 |                  |                    |         |
| All                                  | 2.55 $\pm$ 1.4  | 1.39 $\pm$ 1.46  | 1.55 (1.46 - 1.65) | 7.3E-47 |
| White                                | 2.43 $\pm$ 1.46 | 1.6 $\pm$ 1.35   | 1.47 (1.34 - 1.63) | 7.8E-16 |
| Black                                | 0.83 $\pm$ 1.41 | 0.55 $\pm$ 1.26  | 1.18 (0.96 - 1.47) | 0.12    |
| Hispanic                             | 2.76 $\pm$ 1.25 | 1.9 $\pm$ 1.42   | 1.70 (1.51 - 1.93) | 2.1E-20 |
| <b><u>GRS</u></b>                    |                 |                  |                    |         |
| All                                  | 1.31 $\pm$ 0.85 | 0.44 $\pm$ 0.96  | 2.49 (2.24 - 2.78) | 7.0E-72 |
| White                                | 1.05 $\pm$ 0.81 | 0.53 $\pm$ 0.66  | 2.36 (1.97 - 2.83) | 2.6E-22 |
| Black                                | 0.11 $\pm$ 0.97 | -0.22 $\pm$ 0.95 | 1.42 (1.07 - 1.90) | 0.015   |
| Hispanic                             | 1.59 $\pm$ 0.71 | 0.9 $\pm$ 0.88   | 2.91 (2.39 - 3.57) | 4.4E-31 |

**Table S6.** Baseline Characteristics of UTSW-FLD Patients and Age-, Gender- and Ethnic-Matched Controls.

| Characteristic                          | No. of<br>people<br>with data | UTSW-FLD<br>(n=1162) | Control*<br>(n=1162) | P-value |
|-----------------------------------------|-------------------------------|----------------------|----------------------|---------|
| Age, years, mean $\pm$ SD               | 2324                          | 53.8 $\pm$ 11.9      | 53.4 $\pm$ 12        | 0.42    |
| Female, n (%)                           | 2324                          | 654 (56.3)           | 654 (56.3)           | 1       |
| Race/ethnicity, N (%)                   |                               |                      |                      |         |
| Non-Hispanic Black                      | 2324                          | 424 (36.5)           | 424 (36.5)           | 1       |
| Non-Hispanic White                      | 2324                          | 57 (4.9)             | 57 (4.9)             | 1       |
| Hispanic                                | 2324                          | 646 (55.6)           | 646 (55.6)           | 1       |
| BMI, kg/m <sup>2</sup> , mean $\pm$ SD  | 2324                          | 32.5 $\pm$ 7.4       | 29 $\pm$ 6.2         | <0.001  |
| Glucose, mg/dL, median (IQR)            | 2160                          | 111 (94 - 149)       | 93 (85 - 102)        | <0.001  |
| Type 2 Diabetes, N (%)                  | 2323                          | 491 (42.3)           | 134 (11.5)           | <0.001  |
| Systolic BP, mm Hg, mean $\pm$ SD       | 2302                          | 125.9 $\pm$ 16.5     | 126.5 $\pm$ 19.6     | 0.0036  |
| Diastolic BP, mm Hg, mean $\pm$ SD      | 2302                          | 71.6 $\pm$ 11.5      | 76.4 $\pm$ 8.9       | <0.001  |
| Total cholesterol, mg/dL, mean $\pm$ SD | 1990                          | 162.2 $\pm$ 52.2     | 186.5 $\pm$ 39.5     | <0.001  |
| LDL-cholesterol, mg/dL, mean $\pm$ SD   | 1961                          | 89.5 $\pm$ 38.9      | 108.8 $\pm$ 34.8     | <0.001  |
| HDL-cholesterol, mg/dL, mean $\pm$ SD   | 1984                          | 43.2 $\pm$ 18.6      | 51.4 $\pm$ 14.9      | <0.001  |
| Triglycerides, mg/dL, median (IQR)      | 1990                          | 117 (82 - 178)       | 111 (77 - 162)       | 0.30    |
| ALT (U), median (IQR)                   | 2305                          | 37 (25 - 60)         | 19 (14 - 25)         | <0.001  |
| AST (U), median (IQR)                   | 2302                          | 45 (32 - 67)         | 20 (17 - 25)         | <0.001  |

UTSW-FLD subjects matched to controls for age, gender, and ethnicity. Exact matching for gender and ethnicity, and matching within a caliper (<0.5 SD) for age. BP, blood pressure; TG, triglyceride; ALT, alanine aminotransaminase; AST, aspartate aminotransferase.

**Table S7:** Association of Individual Variants with FLD in the Matched Case-Control Cohort

| Gene variant             | SNP        | Allele | Cases (UTSW-FLD)   |     |     |                     |            | Controls           |     |     |                     |            | OR<br>(95% CI)      | P-value |
|--------------------------|------------|--------|--------------------|-----|-----|---------------------|------------|--------------------|-----|-----|---------------------|------------|---------------------|---------|
|                          |            |        | Genotype frequency |     |     | Allele<br>frequency | P<br>(HWE) | Genotype frequency |     |     | Allele<br>frequency | P<br>(HWE) |                     |         |
|                          |            |        | REF                | HET | HOM |                     |            | REF                | HET | HOM |                     |            |                     |         |
| <b><u>All groups</u></b> |            |        |                    |     |     |                     |            |                    |     |     |                     |            |                     |         |
| PNPLA3 I148M             | rs738409   | G      | 267                | 455 | 438 | 0.5737              | -          | 522                | 481 | 158 | 0.3432              | -          | 2.65 (2.31 - 3.06)  | 2.5E-46 |
| TM6SF2 E167K             | rs58542926 | T      | 972                | 178 | 10  | 0.0853              | -          | 1061               | 98  | 1   | 0.0431              | -          | 2.07 (1.58 - 2.72)  | 7.4E-08 |
| GCKR P446L               | rs1260326  | T      | 474                | 523 | 159 | 0.3638              | -          | 509                | 520 | 133 | 0.3382              | -          | 1.12 (0.98 - 1.28)  | 0.10    |
| TMC4/MBOAT7              | rs641738   | T      | 417                | 545 | 193 | 0.4030              | -          | 467                | 526 | 161 | 0.3674              | -          | 1.17 (1.02 - 1.33)  | 0.020   |
| PNPLA3 S453I             | rs6006460  | T      | 1143               | 8   | 0   | 0.0035              | -          | 1050               | 24  | 2   | 0.0130              | -          | 0.32 (0.13 - 0.7)   | 0.0033  |
| HSD17B13 A192fs          | rs80182459 | -      | 1116               | 31  | 1   | 0.0144              | -          | 1107               | 53  | 2   | 0.0245              | -          | 0.53 (0.32 - 0.86)  | 0.010   |
| HSD17B13 splice          | rs72613567 | TA     | 890                | 231 | 29  | 0.1257              | -          | 819                | 293 | 47  | 0.1670              | -          | 0.78 (0.65 - 0.94)  | 0.0075  |
| <b><u>White</u></b>      |            |        |                    |     |     |                     |            |                    |     |     |                     |            |                     |         |
| PNPLA3 I148M             | rs738409   | G      | 161                | 182 | 80  | 0.4043              | 0.034      | 266                | 143 | 14  | 0.2021              | 0.37       | 2.44 (1.91 - 3.13)  | 2.0E-13 |
| TM6SF2 E167K             | rs58542926 | T      | 326                | 89  | 9   | 0.1262              | 0.37       | 376                | 46  | 0   | 0.0545              | 0.62       | 2.38 (1.6 - 3.57)   | 1.2E-05 |
| GCKR P446L               | rs1260326  | T      | 123                | 219 | 81  | 0.4504              | 0.38       | 153                | 208 | 63  | 0.3939              | 0.61       | 1.32 (1.05 - 1.65)  | 0.015   |
| TMC4/MBOAT7              | rs641738   | T      | 125                | 202 | 95  | 0.4645              | 0.43       | 146                | 196 | 78  | 0.4190              | 0.42       | 1.2 (0.97 - 1.49)   | 0.10    |
| PNPLA3 S453I             | rs6006460  | T      | 422                | 1   | 0   | 0.0012              | 1          | 338                | 1   | 0   | 0.0015              | 1          | 0.8 (0.01 - 63.03)  | 1       |
| HSD17B13 A192fs          | rs80182459 | -      | 418                | 1   | 0   | 0.0012              | 1          | 423                | 1   | 0   | 0.0012              | 1          | 1.01 (0.01 - 79.57) | 1       |
| HSD17B13 splice          | rs72613567 | TA     | 261                | 132 | 28  | 0.2233              | 0.050      | 226                | 163 | 35  | 0.2748              | 0.47       | 0.85 (0.67 - 1.08)  | 0.19    |
| <b><u>Black</u></b>      |            |        |                    |     |     |                     |            |                    |     |     |                     |            |                     |         |
| PNPLA3 I148M             | rs738409   | G      | 36                 | 20  | 1   | 0.1930              | 0.67       | 42                 | 15  | 0   | 0.1316              | 0.58       | 1.86 (0.85 - 4.23)  | 0.12    |
| TM6SF2 E167K             | rs58542926 | T      | 54                 | 3   | 0   | 0.0263              | 1          | 54                 | 3   | 0   | 0.0263              | 1          | 1 (0.13 - 7.8)      | 1       |
| GCKR P446L               | rs1260326  | T      | 48                 | 8   | 1   | 0.0877              | 0.35       | 42                 | 12  | 3   | 0.1579              | 0.12       | 0.6 (0.26 - 1.3)    | 0.20    |
| TMC4/MBOAT7              | rs641738   | T      | 20                 | 31  | 6   | 0.3772              | 0.40       | 28                 | 19  | 7   | 0.3056              | 0.21       | 1.3 (0.73 - 2.36)   | 0.38    |
| PNPLA3 S453I             | rs6006460  | T      | 50                 | 6   | 0   | 0.0536              | 1          | 47                 | 9   | 1   | 0.0965              | 0.41       | 0.58 (0.19 - 1.62)  | 0.31    |
| HSD17B13 A192fs          | rs80182459 | -      | 40                 | 14  | 1   | 0.1455              | 1          | 38                 | 17  | 2   | 0.1842              | 1          | 0.7 (0.32 - 1.48)   | 0.36    |
| HSD17B13 splice          | rs72613567 | TA     | 49                 | 8   | 0   | 0.0702              | 1          | 52                 | 5   | 0   | 0.0439              | 1          | 2.27 (0.68 - 8.22)  | 0.18    |

**Hispanic**

|                 |            |    |     |     |     |        |       |     |     |     |        |      |                    |         |
|-----------------|------------|----|-----|-----|-----|--------|-------|-----|-----|-----|--------|------|--------------------|---------|
| PNPLA3 I148M    | rs738409   | G  | 59  | 238 | 348 | 0.7240 | 0.061 | 191 | 312 | 143 | 0.4628 | 0.48 | 2.76 (2.31 - 3.31) | 2.7E-31 |
| TM6SF2 E167K    | rs58542926 | T  | 566 | 77  | 1   | 0.0613 | 0.50  | 599 | 46  | 1   | 0.0372 | 0.60 | 1.82 (1.23 - 2.73) | 0.0029  |
| GCKR P446L      | rs1260326  | T  | 290 | 277 | 74  | 0.3315 | 0.53  | 296 | 289 | 61  | 0.3181 | 0.47 | 1.04 (0.87 - 1.25) | 0.64    |
| TMC4/MBOAT7     | rs641738   | T  | 264 | 296 | 81  | 0.3573 | 0.93  | 284 | 289 | 72  | 0.3357 | 0.93 | 1.12 (0.94 - 1.33) | 0.22    |
| PNPLA3 S453I    | rs6006460  | T  | 636 | 1   | 0   | 0.0008 | 1     | 634 | 11  | 0   | 0.0085 | 1    | 0.09 (0 - 0.63)    | 0.0061  |
| HSD17B13 A192fs | rs80182459 | -  | 623 | 16  | 0   | 0.0125 | 1     | 617 | 29  | 0   | 0.0224 | 1    | 0.56 (0.28 - 1.06) | 0.076   |
| HSD17B13 splice | rs72613567 | TA | 557 | 80  | 1   | 0.0643 | 0.50  | 516 | 117 | 10  | 0.1065 | 0.30 | 0.63 (0.46 - 0.85) | 0.0027  |

P-values for deviation from Hardy-Weinberg equilibrium (HWE) were calculated using exact test. P-values for association between variant alleles and FLD status were calculated using logistic regression adjusted for age, gender, BMI, and ethnicity (in the all groups analysis).

\*For variants with fewer than 5 carriers in either cases or controls, unadjusted odds ratios and p-values were calculated using Fisher's exact.

**Table S8:** Distribution of Genetic Risk Score in the Matched Case-Control Cohort Stratified by Ethnicity.

| Ethnicity                            | Mean $\pm$ SD   |                  | OR (95% CI)        | P-value |
|--------------------------------------|-----------------|------------------|--------------------|---------|
|                                      | UTSW-FLD        | Matched Controls |                    |         |
| <b><u>Net risk allele number</u></b> |                 |                  |                    |         |
| All                                  | 2.56 $\pm$ 1.40 | 1.78 $\pm$ 1.42  | 1.51 (1.41 - 1.63) | 7.0E-32 |
| White                                | 2.43 $\pm$ 1.47 | 1.54 $\pm$ 1.35  | 1.50 (1.33 - 1.70) | 1.5E-11 |
| Black                                | 0.83 $\pm$ 1.41 | 0.59 $\pm$ 1.25  | 1.15 (0.85 - 1.57) | 0.38    |
| Hispanic                             | 2.79 $\pm$ 1.23 | 2.04 $\pm$ 1.38  | 1.53 (1.39 - 1.69) | 2.6E-19 |
| <b><u>GRS</u></b>                    |                 |                  |                    |         |
| All                                  | 1.36 $\pm$ 0.84 | 0.80 $\pm$ 0.83  | 2.17 (1.96 - 2.42) | 4.3E-53 |
| White                                | 1.10 $\pm$ 0.82 | 0.54 $\pm$ 0.63  | 2.18 (1.79 - 2.67) | 1.8E-16 |
| Black                                | 0.23 $\pm$ 0.87 | -0.05 $\pm$ 0.86 | 1.40 (0.96 - 2.11) | 0.079   |
| Hispanic                             | 1.63 $\pm$ 0.71 | 1.03 $\pm$ 0.81  | 2.23 (1.94 - 2.57) | 4.6E-34 |

**Table S9:** Association with FLD by Quintiles of Genetic Risk Score Stratified by Ethnicity in the Matched Case-Control Cohort

| Ethnicity | Quintile | N     |          | OR<br>(95% CI)      | P-value | P-trend |
|-----------|----------|-------|----------|---------------------|---------|---------|
|           |          | Cases | Controls |                     |         |         |
| ALL       | 1        | 98    | 245      | 1                   | -       |         |
|           | 2        | 111   | 184      | 1.63 (1.13 - 2.35)  | 0.0093  |         |
|           | 3        | 204   | 258      | 2.43 (1.74 - 3.41)  | 1.9E-07 |         |
|           | 4        | 195   | 171      | 3.62 (2.55 - 5.19)  | 1.2E-12 |         |
|           | 5        | 517   | 208      | 8.7 (6.25 - 12.23)  | 1.1E-36 | 9.9E-44 |
| White     | 1        | 37    | 68       | 1                   | -       |         |
|           | 2        | 45    | 69       | 1.05 (0.57 - 1.94)  | 0.88    |         |
|           | 3        | 54    | 69       | 1.42 (0.78 - 2.6)   | 0.25    |         |
|           | 4        | 76    | 63       | 2.05 (1.15 - 3.69)  | 0.015   |         |
|           | 5        | 201   | 67       | 4.57 (2.69 - 7.9)   | 3.0E-08 | 2.1E-11 |
| Black     | 1        | 8     | 15       | 1                   | -       |         |
|           | 2        | 6     | 7        | 1.34 (0.3 - 5.92)   | 0.70    |         |
|           | 3        | 16    | 13       | 2.28 (0.71 - 7.8)   | 0.17    |         |
|           | 4        | 6     | 8        | 1.45 (0.35 - 6.04)  | 0.60    |         |
|           | 5        | 18    | 11       | 3.22 (1.01 - 11)    | 0.053   | 0.064   |
| Hispanic  | 1        | 29    | 131      | 1                   | -       |         |
|           | 2        | 75    | 149      | 2.05 (1.23 - 3.49)  | 0.0064  |         |
|           | 3        | 79    | 116      | 2.82 (1.69 - 4.8)   | 1.0E-04 |         |
|           | 4        | 181   | 127      | 6.16 (3.83 - 10.17) | 2.7E-13 |         |
|           | 5        | 260   | 118      | 8.72 (5.45 - 14.32) | 1.2E-18 | 1.3E-27 |

Association was tested using logistic regression adjusted for age, gender, BMI, ethnicity (in the all groups analysis), and T2D.

**Table S10:** Distribution of Genetic Risk Score Based on External Weights in the Primary Cohort Stratified by Ethnicity

| Ethnicity  | Mean $\pm$ SD   |                 | OR (95% CI)        | P-value |
|------------|-----------------|-----------------|--------------------|---------|
|            | UTSW-FLD        | Controls        |                    |         |
| <b>GRS</b> |                 |                 |                    |         |
| All        | 1.07 $\pm$ 0.64 | 0.47 $\pm$ 0.61 | 2.17 (1.98 - 2.38) | 1.5E-70 |
| White      | 0.88 $\pm$ 0.65 | 0.47 $\pm$ 0.54 | 1.98 (1.72 - 2.3)  | 3.4E-22 |
| Black      | 0.28 $\pm$ 0.56 | 0.13 $\pm$ 0.51 | 1.35 (0.99 - 1.82) | 0.0597  |
| Hispanic   | 1.26 $\pm$ 0.55 | 0.76 $\pm$ 0.62 | 2.51 (2.12 - 3)    | 1.4E-30 |

**Table S11:** Association with FLD by Quintiles of Genetic Risk Score Based on External Weights in the Primary Cohort Stratified by Ethnicity

| Ethnicity | Quintile | N     |          | OR<br>(95% CI)       | P-value | P-trend |
|-----------|----------|-------|----------|----------------------|---------|---------|
|           |          | Cases | Controls |                      |         |         |
| ALL       | 1        | 72    | 1018     | 1                    | -       |         |
|           | 2        | 60    | 564      | 0.83 (0.56 - 1.24)   | 0.37    |         |
|           | 3        | 139   | 612      | 1.49 (1.06 - 2.1)    | 0.023   |         |
|           | 4        | 340   | 641      | 2.75 (2.02 - 3.78)   | 2.0E-10 |         |
|           | 5        | 546   | 272      | 7.43 (5.43 - 10.28)  | 5.8E-35 | 3.9E-54 |
| White     | 1        | 46    | 222      | 1                    | -       |         |
|           | 2        | 37    | 122      | 1.18 (0.69 - 2.01)   | 0.54    |         |
|           | 3        | 66    | 204      | 1.3 (0.83 - 2.06)    | 0.26    |         |
|           | 4        | 79    | 142      | 2.6 (1.65 - 4.11)    | 4.0E-05 |         |
|           | 5        | 190   | 169      | 4.47 (2.98 - 6.8)    | 1.0E-12 | 1.4E-16 |
| Black     | 1        | 8     | 356      | 1                    | -       |         |
|           | 2        | 13    | 443      | 1.3 (0.54 - 3.34)    | 0.57    |         |
|           | 3        | 8     | 341      | 1.06 (0.38 - 2.92)   | 0.92    |         |
|           | 4        | 7     | 280      | 1.17 (0.4 - 3.33)    | 0.77    |         |
|           | 5        | 18    | 340      | 2.29 (1.01 - 5.7)    | 0.057   | 0.0647  |
| Hispanic  | 1        | 28    | 95       | 1                    | -       |         |
|           | 2        | 51    | 73       | 2.69 (1.41 - 5.2)    | 0.0030  |         |
|           | 3        | 113   | 94       | 4.06 (2.27 - 7.45)   | 3.6E-06 |         |
|           | 4        | 116   | 70       | 7.16 (3.95 - 13.36)  | 2.2E-10 |         |
|           | 5        | 338   | 83       | 15.99 (9.13 - 28.94) | 3.8E-21 | 6.1E-27 |

Association was tested using logistic regression adjusted for age, gender, BMI, ethnicity (in the all groups analysis), and T2D.



**Table S12:** Distribution of Genetic Risk Score without PNPLA3 I148M Variant, Stratified by Ethnicity

| Ethnicity                            | Mean $\pm$ SD    |                  | OR (95% CI)        | P-value |
|--------------------------------------|------------------|------------------|--------------------|---------|
|                                      | UTSW-FLD         | Controls         |                    |         |
| <b><u>Net risk allele number</u></b> |                  |                  |                    |         |
| All                                  | 1.41 $\pm$ 1.2   | 0.84 $\pm$ 1.22  | 1.31 (1.22 - 1.4)  | 1.7E-14 |
| White                                | 1.63 $\pm$ 1.3   | 1.17 $\pm$ 1.2   | 1.3 (1.17 - 1.44)  | 1.4E-06 |
| Black                                | 0.43 $\pm$ 1.19  | 0.28 $\pm$ 1.15  | 1.12 (0.88 - 1.43) | 0.34    |
| Hispanic                             | 1.33 $\pm$ 1.07  | 1.01 $\pm$ 1.13  | 1.35 (1.18 - 1.55) | 7.9E-06 |
| <b><u>GRS</u></b>                    |                  |                  |                    |         |
| All                                  | 0.22 $\pm$ 0.4   | -0.08 $\pm$ 0.61 | 1.83 (1.61 - 2.09) | 3.4E-22 |
| White                                | 0.28 $\pm$ 0.43  | 0.12 $\pm$ 0.36  | 1.76 (1.43 - 2.18) | 1.2E-07 |
| Black                                | -0.28 $\pm$ 0.73 | -0.48 $\pm$ 0.78 | 1.27 (1 - 1.64)    | 0.048   |
| Hispanic                             | 0.22 $\pm$ 0.32  | 0.05 $\pm$ 0.45  | 2.24 (1.72 - 2.97) | 3.6E-10 |

**Table S13:** Association with FLD by Quintiles of Genetic Risk Score without PNPLA3 I148M Variant, Stratified by Ethnicity

| Ethnicity | Quintile | N     |          | OR<br>(95% CI)     | P-value  | P-trend |
|-----------|----------|-------|----------|--------------------|----------|---------|
|           |          | Cases | Controls |                    |          |         |
| ALL       | 1        | 73    | 1011     | 1                  | -        |         |
|           | 2        | 246   | 692      | 2.04 (1.49 - 2.84) | 1.45E-05 |         |
|           | 3        | 180   | 457      | 2.27 (1.62 - 3.2)  | 2.46E-06 |         |
|           | 4        | 332   | 606      | 2.24 (1.64 - 3.09) | 7.03E-07 |         |
|           | 5        | 327   | 341      | 3.84 (2.78 - 5.35) | 9.08E-16 | 7.3E-14 |
| White     | 1        | 68    | 192      | 1                  | -        |         |
|           | 2        | 51    | 156      | 0.93 (0.59 - 1.47) | 0.763    |         |
|           | 3        | 82    | 188      | 1.12 (0.74 - 1.71) | 0.588    |         |
|           | 4        | 74    | 170      | 1.08 (0.7 - 1.65)  | 0.727    |         |
|           | 5        | 144   | 153      | 2.3 (1.55 - 3.42)  | 3.9E-05  | 2.8E-05 |
| Black     | 1        | 6     | 365      | 1                  | -        |         |
|           | 2        | 8     | 353      | 1.42 (0.49 - 4.39) | 0.521    |         |
|           | 3        | 21    | 463      | 2.97 (1.25 - 8.21) | 0.0213   |         |
|           | 4        | 11    | 266      | 2.62 (0.97 - 7.73) | 0.0636   |         |
|           | 5        | 8     | 313      | 1.61 (0.55 - 4.98) | 0.385    | 0.19    |
| Hispanic  | 1        | 57    | 95       | 1                  | -        |         |
|           | 2        | 219   | 132      | 2.73 (1.73 - 4.34) | 1.8E-05  |         |
|           | 3        | 94    | 51       | 2.6 (1.5 - 4.55)   | 7.1E-04  |         |
|           | 4        | 127   | 68       | 3.06 (1.83 - 5.17) | 2.2E-05  |         |
|           | 5        | 149   | 69       | 3.8 (2.29 - 6.36)  | 2.8E-07  | 1.5E-05 |

Association was tested using logistic regression adjusted for age, gender, BMI, ethnicity (in the all groups analysis), and T2D.

Figure S1

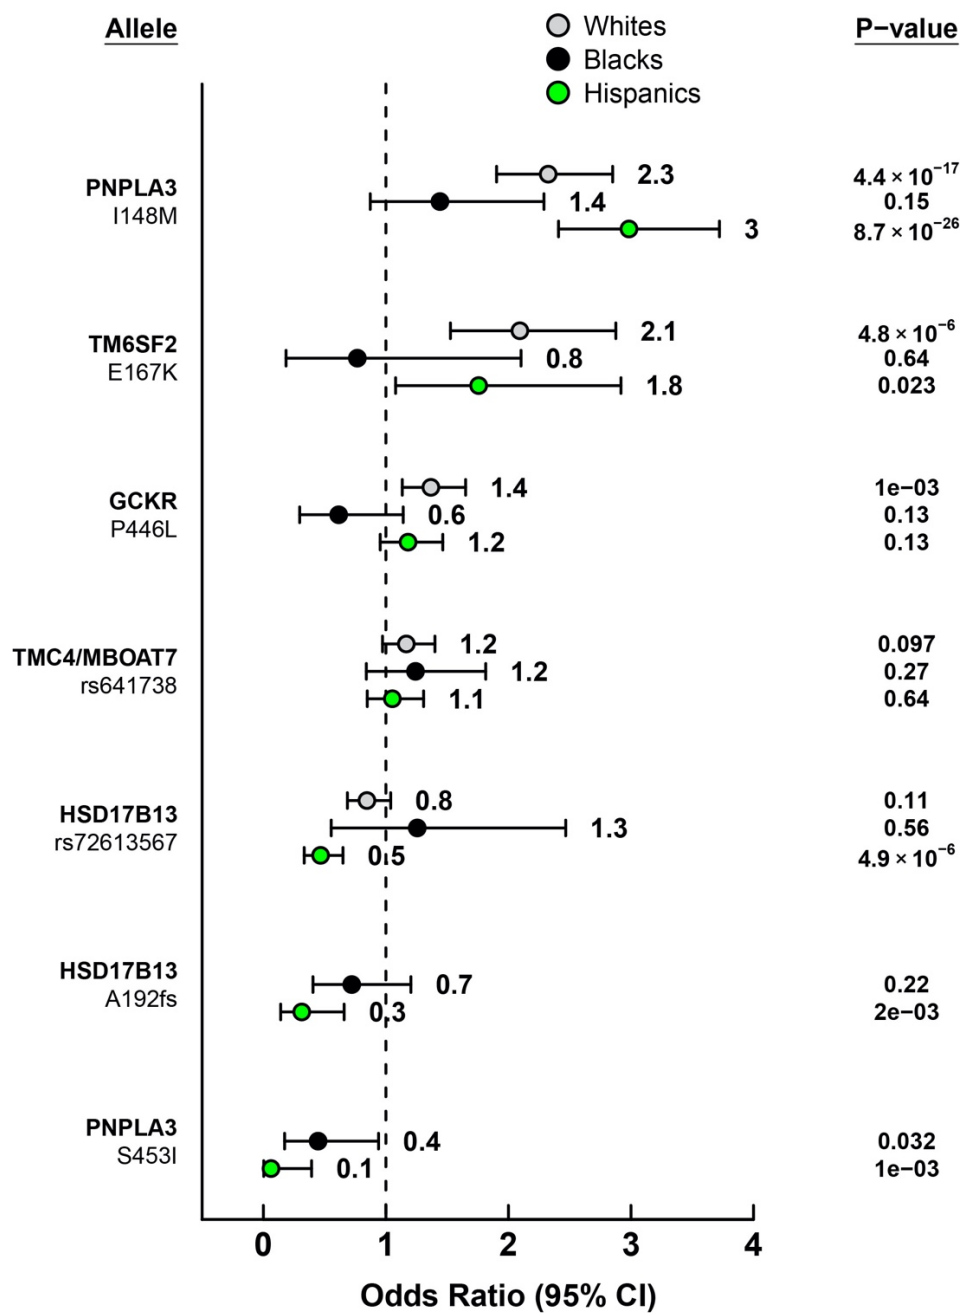

**Fig S1. Ethnicity specific comparison of risk allele frequencies between UTSW-FLD Cohort participants and controls**

Odds ratios were calculated by logistic regression analysis. Error bars are 95% confidence intervals.

Figure S2

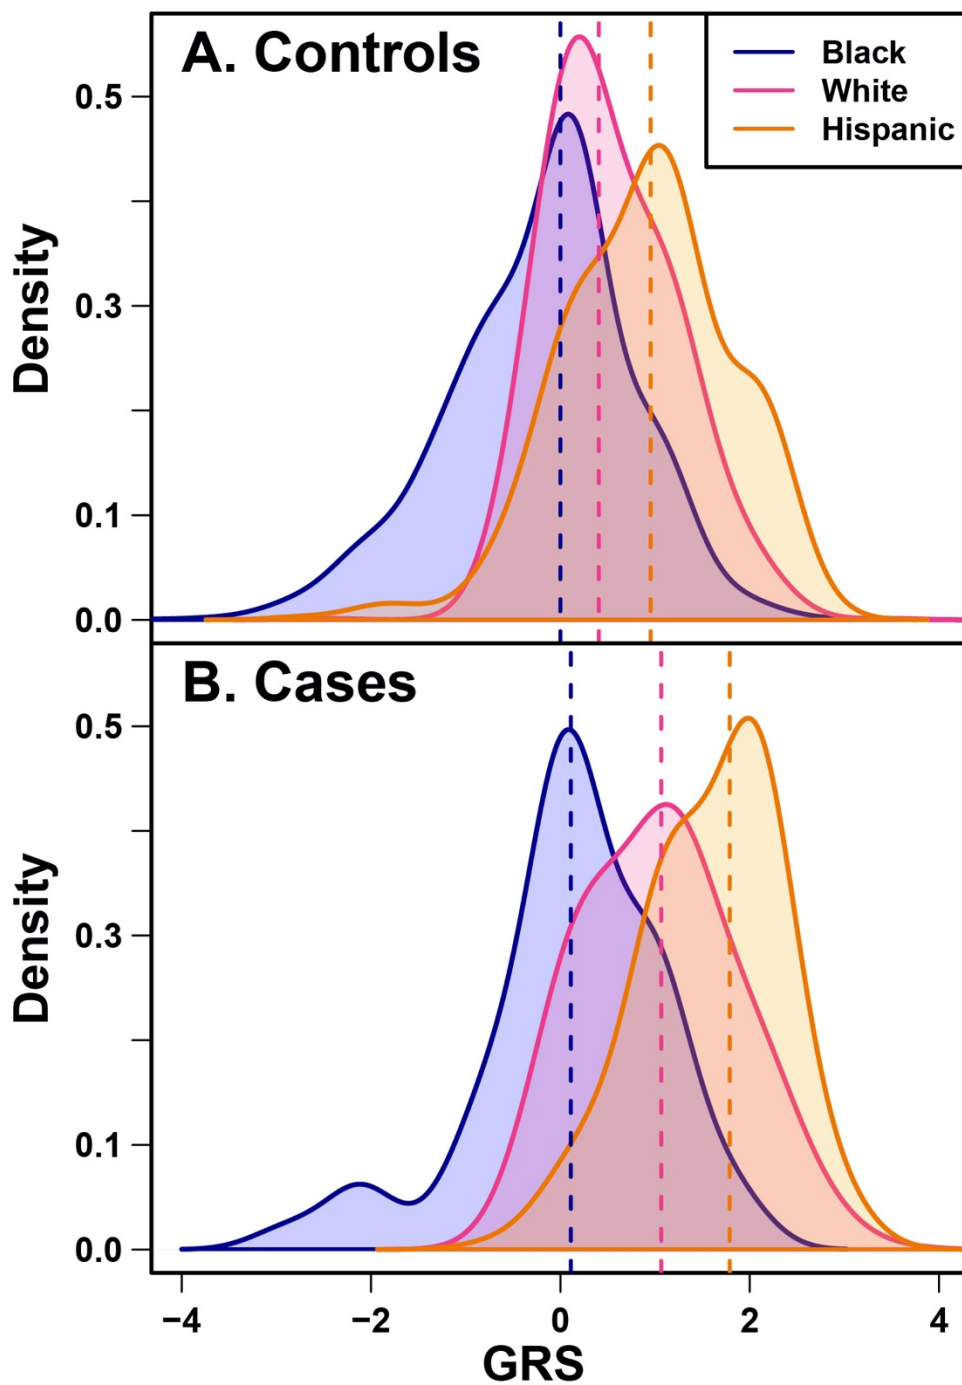

Fig S2. Distribution of GRS among cases and controls stratified by ethnicity.

Dashed lines denote the means.

## References

1. Kozlitina J, Smagris E, Stender S, et al. Exome-wide association study identifies a TM6SF2 variant that confers susceptibility to nonalcoholic fatty liver disease. *Nat Genet.* Apr 2014;46(4):352-6. doi:10.1038/ng.2901
2. Kozlitina J. Genetic Risk Factors and Disease Modifiers of Nonalcoholic Steatohepatitis. *Gastroenterol Clin North Am.* Mar 2020;49(1):25-44. doi:10.1016/j.gtc.2019.09.001
3. Tian C, Stokowski RP, Kershenovich D, Ballinger DG, Hinds DA. Variant in PNPLA3 is associated with alcoholic liver disease. *Nat Genet.* Jan 2010;42(1):21-3. doi:10.1038/ng.488
4. Buch S, Stickel F, Trepo E, et al. A genome-wide association study confirms PNPLA3 and identifies TM6SF2 and MBOAT7 as risk loci for alcohol-related cirrhosis. *Nat Genet.* Dec 2015;47(12):1443-8. doi:10.1038/ng.3417
5. Gellert-Kristensen H, Richardson TG, Davey Smith G, Nordestgaard BG, Tybjaerg-Hansen A, Stender S. Combined Effect of PNPLA3, TM6SF2, and HSD17B13 Variants on Risk of Cirrhosis and Hepatocellular Carcinoma in the General Population. *Hepatology.* Sep 2020;72(3):845-856. doi:10.1002/hep.31238
6. Abul-Husn NS, Cheng X, Li AH, et al. A Protein-Truncating HSD17B13 Variant and Protection from Chronic Liver Disease. *N Engl J Med.* Mar 22 2018;378(12):1096-1106. doi:10.1056/NEJMoa1712191
7. Palmer ND, Kahali B, Kuppaa A, et al. Allele-specific variation at APOE increases nonalcoholic fatty liver disease and obesity but decreases risk of Alzheimer's disease and myocardial infarction. *Hum Mol Genet.* Jul 9 2021;30(15):1443-1456. doi:10.1093/hmg/ddab096
8. Romeo S, Kozlitina J, Xing C, et al. Genetic variation in PNPLA3 confers susceptibility to nonalcoholic fatty liver disease. *Nat Genet.* Dec 2008;40(12):1461-5. doi:10.1038/ng.257
